# Supplementary material
Source: PubMed Central journal article supplement (PMC6136661)

# Universal Pneumatic Controller Setup Schematic

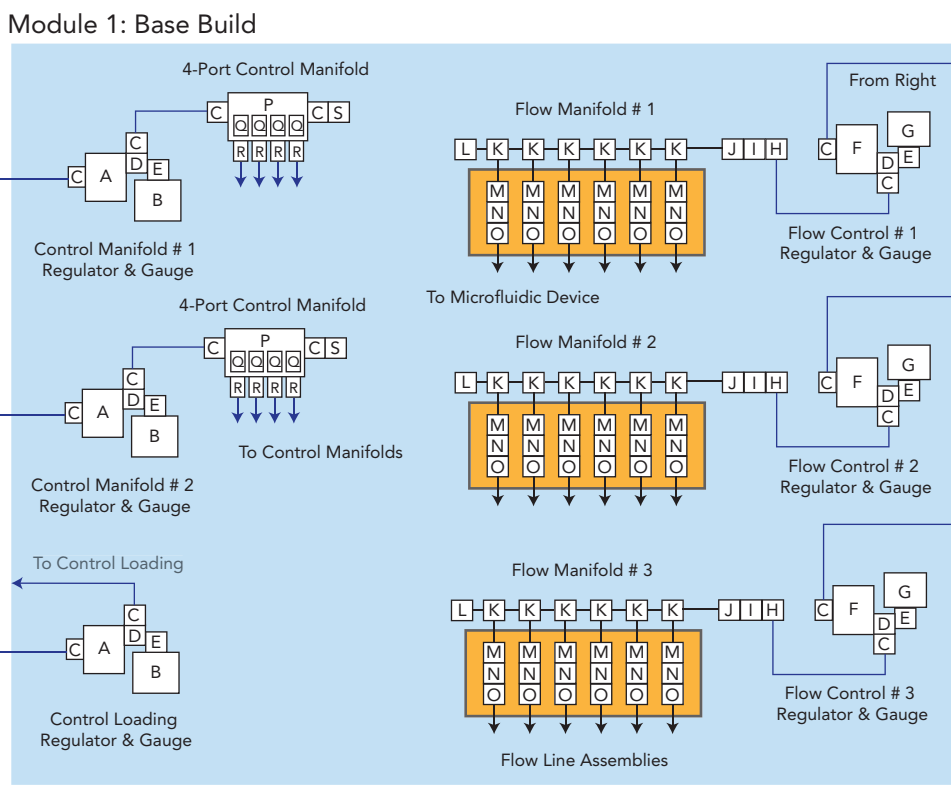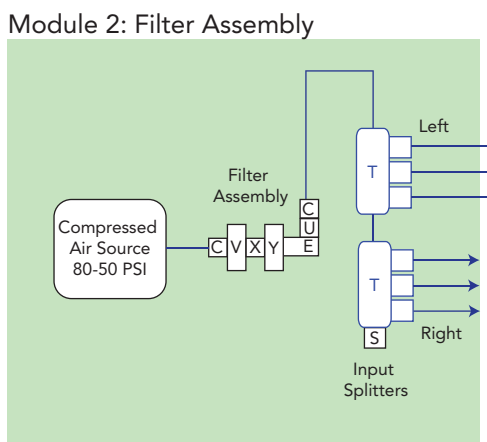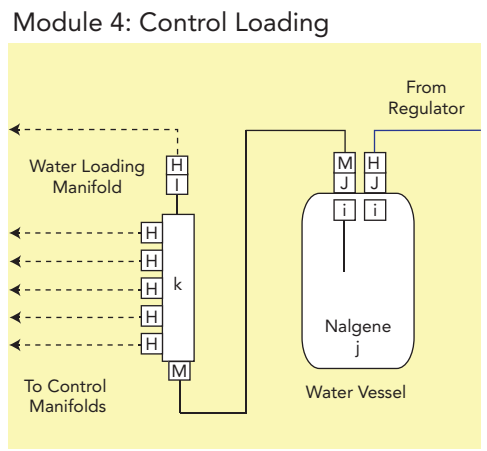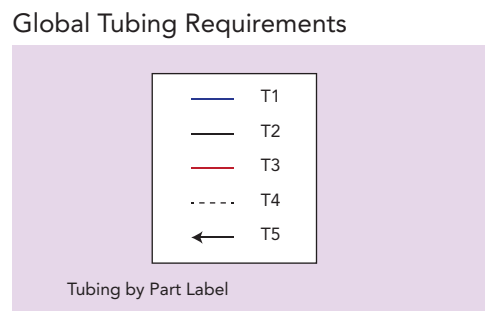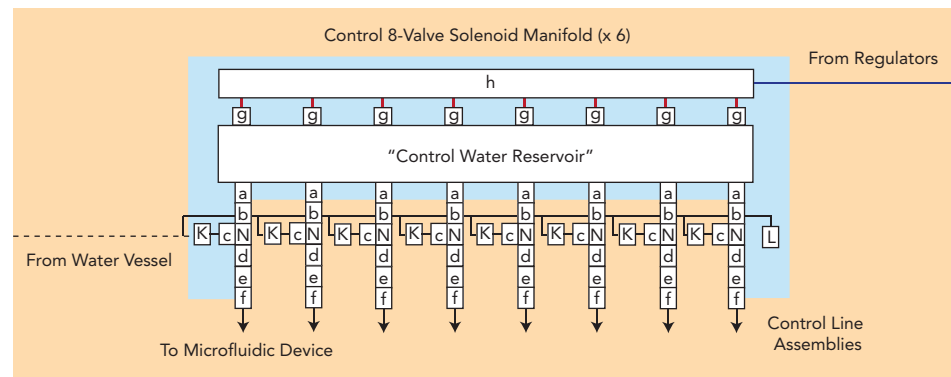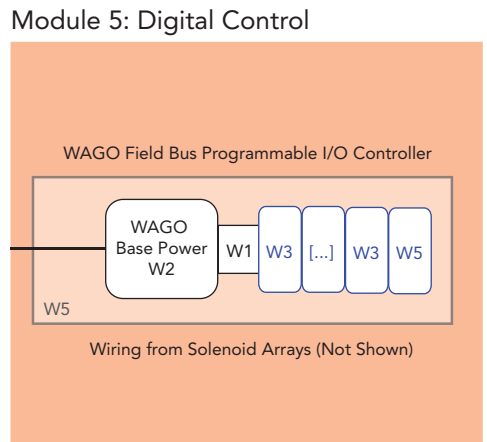

Module 3: Control Valve Manifolds

Supplement: NIHMS943884-supplement-2.pdf [file NIHMS943884-supplement-2.pdf]
